# Supplementary material
Source: PubMed Central journal article supplement (PMC3989865)
Supplement: embr0015-0191-sd4.pdf [file embr0015-0191-sd4.pdf]

**Figure S3. The TM phosphorylation of PKC $\zeta$  is required for regulating actin cytoskeleton organization in Rictor null MEF cells.** Ric<sup>-/-</sup> MEF cells transfected with EGFP-PKC $\zeta$ /T560D (A) or EGFP-PKC $\zeta$ /T560A (B) were seeded on fibronectin-coated coverslips and treated with EGF. Actin was visualized using Alexa594-phalloidin (panels i and iii), whereas the transfected cells were visualized by EGFP (panels ii and iv). Arrows mark the transfected cells. Note that one cell transfected with EGFP-PKC $\zeta$ /T560D showed no lamellipodia formation (marked by an arrow head). Scale bar = 50  $\mu$ m.

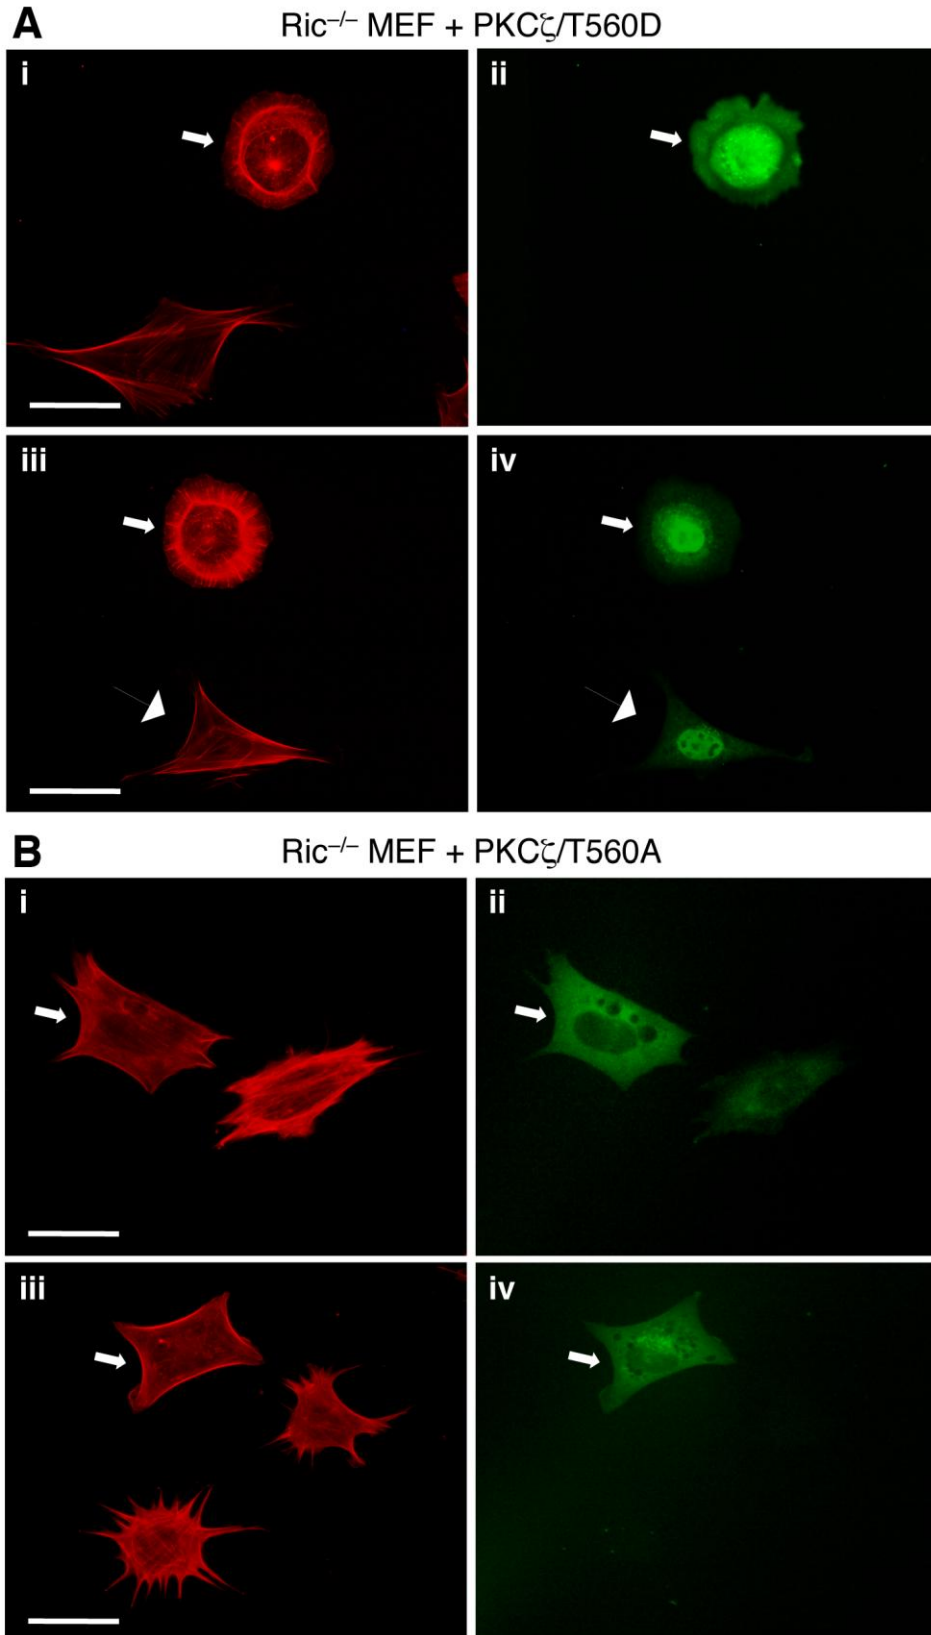

Supplemental Figure S3
